# Supplementary material for: Implementation factors and their effect on e-Health service adoption in rural communities: a systematic literature review
Source: PubMed Central journal article supplement (PMC3575225; doi:10.1186/1472-6963-13-19), 2013-01-12
Supplement: 1472-6963-13-19-S1.pdf [file 1472-6963-13-19-S1.pdf]

## Appendix A: Overview of papers included in the systematic literature review

| Art .nr | Author             | Year | Persp. | Context and study population                                          | Research aim                                                                        | E-Health intervention type & aim                                                                                       | Method                                                                                                             | Main results                                                                                                                                                                                                                                                                                                                                                                                                                                                                                                                                                          |
|---------|--------------------|------|--------|-----------------------------------------------------------------------|-------------------------------------------------------------------------------------|------------------------------------------------------------------------------------------------------------------------|--------------------------------------------------------------------------------------------------------------------|-----------------------------------------------------------------------------------------------------------------------------------------------------------------------------------------------------------------------------------------------------------------------------------------------------------------------------------------------------------------------------------------------------------------------------------------------------------------------------------------------------------------------------------------------------------------------|
| 52      | Aminuzzaman et al. | 2003 | A,B1,E | <p><b>Context:</b> Asia (Bangladesh)</p> <p><b>SP:</b> rural poor</p> | Assessing the efficacy of the village phone in ameliorating the information poverty | <p>Telecommunication (mobiles)</p> <p>Providing modern telecommunication services to the poor people in Bangladesh</p> | <p>Multi-method: interviews, <b>N= Unknown</b></p> <p>survey <b>N=423</b></p> <p><b>Response rate= Unknown</b></p> | <p><b>Context factors in e-Health adoption:</b></p> <p>Age (24-25yr)</p> <p>Gender (literate men)</p> <p>Education (literacy)</p> <p>Traders and entrepreneurs (+)</p> <p>Farmers (-)</p> <p><b>e-Health adoption outcomes:</b></p> <p>Ownership: Married housewives</p> <p>Ownership: Age (35-55yr)</p> <p>Time saving (+)</p> <p>Social contacts migrant workers (+)</p> <p>Uncertainty (-)</p> <p>Anxiety (-)</p> <p>Speed and quality decision making (+)</p> <p>Health services (0)</p> <p>Gender roles (0)</p> <p>Empowerment higher in traditional regions</p> |

|    |                        |      |        |                                                                   |                                                              |                                                                                             |                                                                                                                                                                                        |                                                                                                                                                                                                                                                                                                                                                                                                                                                                                                                                                                                                                                                                                                                                                                                                                            |
|----|------------------------|------|--------|-------------------------------------------------------------------|--------------------------------------------------------------|---------------------------------------------------------------------------------------------|----------------------------------------------------------------------------------------------------------------------------------------------------------------------------------------|----------------------------------------------------------------------------------------------------------------------------------------------------------------------------------------------------------------------------------------------------------------------------------------------------------------------------------------------------------------------------------------------------------------------------------------------------------------------------------------------------------------------------------------------------------------------------------------------------------------------------------------------------------------------------------------------------------------------------------------------------------------------------------------------------------------------------|
| 62 | Balasubramanian et al. | 2010 | B1,D,E | <p><b>Context:</b> Asia (India)</p> <p><b>SP:</b> rural women</p> | Understanding gender dimension in mobile phone learning tool | <p>Telecommunication (mobiles)</p> <p>Enhancing lifelong learning through mobile phones</p> | <p>Multi-method:</p> <p>Interviews, focus group discussions, participant observations</p> <p><b>N= Unknown</b></p> <p>Survey</p> <p><b>N= 73</b></p> <p><b>Response rate= 100%</b></p> | <p><b>Context factors in e-Health adoption:</b></p> <p>Low literacy levels (-)</p> <p>Social hierarchy: teacher/student hierarchy (-)</p> <p><b>Process factors in e-Health adoption:</b></p> <p>Women participation (+)</p> <p>Women ICT ownership (+)</p> <p>Contextualization information (+)</p> <p>Training (+)</p> <p>F2F meetings (+)</p> <p>Distribution through formal functions (reinforce ownership) (+)</p> <p>Asking family members for help (+)</p> <p><b>Content factors in e-Health adoption:</b></p> <p>Costs calling/participating (-)</p> <p>Mobile phone: learning &amp; mobility (+)</p> <p><b>e-Health adoption outcomes:</b></p> <p>Using/bringing phone</p> <p>Listening to voicemails</p> <p>Applying information</p> <p>Sharing voicemail information</p> <p>Phone as symbol self-dependency</p> |
|----|------------------------|------|--------|-------------------------------------------------------------------|--------------------------------------------------------------|---------------------------------------------------------------------------------------------|----------------------------------------------------------------------------------------------------------------------------------------------------------------------------------------|----------------------------------------------------------------------------------------------------------------------------------------------------------------------------------------------------------------------------------------------------------------------------------------------------------------------------------------------------------------------------------------------------------------------------------------------------------------------------------------------------------------------------------------------------------------------------------------------------------------------------------------------------------------------------------------------------------------------------------------------------------------------------------------------------------------------------|

|    |       |      |   |                                                                          |                                                                                                |                                                              |                                                       |                                                                                                                                                                                                                           |
|----|-------|------|---|--------------------------------------------------------------------------|------------------------------------------------------------------------------------------------|--------------------------------------------------------------|-------------------------------------------------------|---------------------------------------------------------------------------------------------------------------------------------------------------------------------------------------------------------------------------|
|    |       |      |   |                                                                          |                                                                                                |                                                              |                                                       | Women maintain ownership (+)<br>Cognitive social capital (+)<br>Access market information (+)<br>Transport/opportunity costs (-)<br>Social network (+)<br>Calls to other participants (0)<br>In project participation (+) |
| 67 | Boase | 2010 | A | <b>Context:</b><br>North America (USA)<br><br><b>SP:</b> American adults | Examining externality of personal networks in relation to low internet adoption in rural areas | (Broadband) internet and social media<br><br>No intervention | Survey<br><b>N= 2200</b><br><b>Response rate= 35%</b> | <b>Context factors in e-Health adoption:</b><br>Age (-)<br>Education (+)<br>Occupational status (+)<br>Occupational diversity (+)<br>Ties with internet access (+)<br>Single need e-mail (- high speed internet access)   |

|    |                |      |      |                                                                                    |                                                                                                    |                                                                                                                                                                                                                      |                                                                                                                                                         |                                                                                                                                                                                                                                                                                                                                                                                                                                       |
|----|----------------|------|------|------------------------------------------------------------------------------------|----------------------------------------------------------------------------------------------------|----------------------------------------------------------------------------------------------------------------------------------------------------------------------------------------------------------------------|---------------------------------------------------------------------------------------------------------------------------------------------------------|---------------------------------------------------------------------------------------------------------------------------------------------------------------------------------------------------------------------------------------------------------------------------------------------------------------------------------------------------------------------------------------------------------------------------------------|
| 49 | Borgida et al. | 2002 | D    | <p><b>Context:</b><br/>North America (USA)</p> <p><b>SP:</b> rural communities</p> | Investigating norms of cooperation and civic and political culture and (public) access to e-Health | <p>Community networks</p> <p>Increasing the community's access to and use of the national information infrastructure, sharing data and information with and between community members and partner organizations.</p> | <p>2 x Survey</p> <p>(Survey 1)<br/><b>N= 2000</b><br/><b>Response rate= 40%</b></p> <p>(Survey 2)<br/><b>N= 2791</b><br/><b>Response rate= 64%</b></p> | <p><b>Context factors in e-Health adoption:</b></p> <p>High civic involvement (+)<br/>Long history of civic organization (+)<br/>ICT access perceived as market responsibility (-)<br/>Low income (-)<br/>Negative perceptions of ICT (-)<br/>Community structures seems to mediate the impact of ICT access</p> <p><b>e-Health adoption outcomes:</b></p> <p>Digital divide (-)<br/>Income no longer predicted e-Health adoption</p> |
| 63 | Burrell        | 2010 | B2,E | <p><b>Context:</b><br/>Africa (Uganda)</p> <p><b>SP:</b> rural women</p>           | Understanding inequalities that emerge from informal sharing of mobile phones in Uganda            | <p>Telecommunication (mobiles)</p> <p>Decreasing inequalities in access of mobile phones</p>                                                                                                                         | <p>Interviews</p> <p><b>N= 52</b></p>                                                                                                                   | <p><b>e-Health adoption outcome:</b></p> <p>Medium to preserve/enhancing/challenge pre-existing social structures<br/>Power struggle over phone Gifting<br/>In- and excluding sharing behavior (secrecy/hiding)<br/>New, more individual communication lines lessen control husbands on communication wife<br/>Systematic exclusion of women</p>                                                                                      |

|    |                 |      |        |                                                                                |                                                        |                                                                                                          |                                                                      |                                                                                                                                                                                                                                                                                                                                                                                                                                                                                                                                                                                                                        |
|----|-----------------|------|--------|--------------------------------------------------------------------------------|--------------------------------------------------------|----------------------------------------------------------------------------------------------------------|----------------------------------------------------------------------|------------------------------------------------------------------------------------------------------------------------------------------------------------------------------------------------------------------------------------------------------------------------------------------------------------------------------------------------------------------------------------------------------------------------------------------------------------------------------------------------------------------------------------------------------------------------------------------------------------------------|
| 8  | Bynum et al.    | 2003 | B1     | <p><b>Context:</b> North America (USA)</p> <p><b>SP:</b> rural communities</p> | Assessing differences in e-Health program satisfaction | <p>Videoconferencing and telehealth</p> <p>Providing more healthcare information and increase health</p> | <p>Survey</p> <p><b>N= 2567</b></p> <p><b>Response rate= 69%</b></p> | <p><b>Context factors e-Health adoption (satisfaction):</b></p> <p>Rural population (+)</p> <p>Minority populations (+)</p> <p>Age (+)</p> <p>Education (-)</p> <p>Limited access health care knowledge (+)</p> <p><b>Process factors in e-Health adoption:</b></p> <p>Education methods (+)</p>                                                                                                                                                                                                                                                                                                                       |
| 24 | Cecchini, Raina | 2004 | A,B1,C | <p><b>Context:</b> Asia (India)</p> <p><b>SP:</b> rural poor community</p>     | Assessing impact e-government project                  | <p>Community networks</p> <p>Increasing the efficiency of information distribution and access</p>        | <p>Survey</p> <p><b>N= 105</b></p> <p><b>Response rate= 100%</b></p> | <p><b>Context factors in e-Health adoption:</b></p> <p>Poverty (-)</p> <p>geographical isolation (-)</p> <p>Gender (women) (-)</p> <p>Cast barriers (-)</p> <p><b>Process factors in e-Health adoption:</b></p> <p>Educated, willing operator (+)</p> <p>Lack technical support (-)</p> <p>Unclarity information (-)</p> <p><b>Content factors in e-Health adoption:</b></p> <p>Slow internet (-)</p> <p>Uncertainty electricity (-)</p> <p>Not need based (-)</p> <p>No budget improve quality of service backend (-)</p> <p><b>e-Health adoption outcomes:</b></p> <p>Costs (-)</p> <p>Harassment/corruption (-)</p> |

|    |                    |      |    |                                                                      |                                                                       |                                                                                                               |                                                          |                                                                                                                                                                                                                                                                                                                                    |
|----|--------------------|------|----|----------------------------------------------------------------------|-----------------------------------------------------------------------|---------------------------------------------------------------------------------------------------------------|----------------------------------------------------------|------------------------------------------------------------------------------------------------------------------------------------------------------------------------------------------------------------------------------------------------------------------------------------------------------------------------------------|
|    |                    |      |    |                                                                      |                                                                       |                                                                                                               |                                                          | Low use/awareness (-)<br>Insufficient revenues (-)                                                                                                                                                                                                                                                                                 |
| 53 | Chowdhury          | 2006 | B1 | <b>Context:</b> Asia (Bangladesh)<br><br><b>SP:</b> rural households | Examining household market participation effects of telecommunication | Telecommunication (mobiles)<br><br>Increasing the access to information and reducing the search costs         | Survey<br><b>N= 284</b><br><b>Response rate= Unknown</b> | <b>e-Health adoption outcomes:</b><br>Information seeking / transaction costs (-)<br>Informed business (+)<br>Informed social (+)<br>Market participation (+)                                                                                                                                                                      |
| 9  | Ferrer-Roca et al. | 2010 | B1 | <b>Context:</b> Europe (Spain)<br><br><b>SP:</b> rural patients      | Assessing quality of life effects of e-Health                         | Videoconferencing and telehealth<br><br>Decreasing overall waiting time, discomfort, financial or time costs. | Survey<br><b>N= 800</b><br><b>Response rate= 81,9%</b>   | <b>Process factors in e-Health adoption:</b><br>Political top-down decision (+)<br>Resistance to use (-)<br><b>Content factors in e-Health adoption:</b><br>Simple ordinary videoconferencing (+)<br><b>e-Health adoption outcomes:</b><br>Health (0)<br>Quality of life (0)<br>Travel costs (-)<br>Time costs (-)<br>Workload (-) |

|    |                  |      |      |                                                                                                      |                                                              |                                                                                                              |                                                                                                                          |                                                                                                                                                                                                                                                                                                                                                                                                                                                                                                                                    |
|----|------------------|------|------|------------------------------------------------------------------------------------------------------|--------------------------------------------------------------|--------------------------------------------------------------------------------------------------------------|--------------------------------------------------------------------------------------------------------------------------|------------------------------------------------------------------------------------------------------------------------------------------------------------------------------------------------------------------------------------------------------------------------------------------------------------------------------------------------------------------------------------------------------------------------------------------------------------------------------------------------------------------------------------|
| 73 | Forestier et al. | 2002 | A,B2 | <p><b>Context:</b><br/>cross-country (Bangladesh, Botswana, Zimbabwe)</p> <p><b>SP:</b> the poor</p> | Understanding how teledensity may affect economic inequality | <p>(Broadband) internet and social media, telecommunication (mobiles)</p> <p>Enhancing economic benefits</p> | <p>Survey (cross-country)</p> <p><b>N= Unknown</b></p>                                                                   | <p><b>Context factors in e-Health adoption:</b><br/>Rural/low connection density (-)<br/>Income (+)<br/>Education (+)</p> <p><b>Process factors in e-Health adoption:</b><br/>Language barriers (-)</p> <p><b>Content factors in e-Health adoption:</b><br/>Costs (-)</p> <p><b>e-Health adoption outcomes:</b><br/>high initial teledensity and high teledensity growth increase inequality rich and poor and rural and urban<br/>Quality of life(life expectancy, child mortality, literacy secondary school enrollment) (0)</p> |
| 88 | Fortin           | 2003 | B1   | <p><b>Context:</b><br/>North America (Canada)</p> <p><b>SP:</b> patients of a local hospital</p>     | Evaluating a telemedicine network                            | <p>Videoconferencing and telehealth</p> <p>Complementing the organization of health services locally</p>     | <p>Semi-structured interviews<br/><b>N= 15</b><br/>Interviews<br/><b>N= 34</b><br/>Observation<br/>Document analysis</p> | <p><b>e-Health adoption outcomes:</b><br/>Speed obtaining health services/diagnosing (+)<br/>Waiting time (-)<br/>Time (-)<br/>Costs (-)<br/>Communication spouse/treating physician (+)<br/>Knowledge professionals (+)</p>                                                                                                                                                                                                                                                                                                       |

|    |               |      |    |                                                                                                                  |                                                                  |                                                                                                                                                   |                           |                                                                                                                                                                                                                                                                                                                                                                                                                                                                                                                                                                                                      |
|----|---------------|------|----|------------------------------------------------------------------------------------------------------------------|------------------------------------------------------------------|---------------------------------------------------------------------------------------------------------------------------------------------------|---------------------------|------------------------------------------------------------------------------------------------------------------------------------------------------------------------------------------------------------------------------------------------------------------------------------------------------------------------------------------------------------------------------------------------------------------------------------------------------------------------------------------------------------------------------------------------------------------------------------------------------|
| 61 | Gagnon et al. | 2006 | B1 | <p><b>Context:</b><br/>North America (Canada)</p> <p><b>SP:</b><br/>physicians and managers in a remote area</p> | Investigating perceptions of telehealth, physicians and managers | <p>Videoconferencing and telehealth</p> <p>Increasing access to, and quality of, health care services and to lower health system expenditures</p> | Interviews<br><b>N=54</b> | <p><b>Perceptions factors e-Health adoption:</b><br/>User-friendly/Need based<br/>Integration daily practice<br/>Motivation patients<br/>Participation professionals<br/>Rules for reliability<br/>Support organization<br/>Organizational resources available<br/>Integration workflow<br/>Regional agreement stakeholders</p> <p><b>Perceptions e-Health adoption outcomes:</b><br/>Access (+)<br/>Continuity (+)<br/>Information/service availability (+)<br/>Medical education (+)<br/>Contact with Peers (+)<br/>Feeling isolation (-)<br/>Costs (-)<br/>Fear replacement on site physician</p> |
|----|---------------|------|----|------------------------------------------------------------------------------------------------------------------|------------------------------------------------------------------|---------------------------------------------------------------------------------------------------------------------------------------------------|---------------------------|------------------------------------------------------------------------------------------------------------------------------------------------------------------------------------------------------------------------------------------------------------------------------------------------------------------------------------------------------------------------------------------------------------------------------------------------------------------------------------------------------------------------------------------------------------------------------------------------------|

|    |                |      |     |                                                                                                          |                                                                                                     |                                                                                                                                    |                                                                                                                    |                                                                                                                                                                                                                                                                                                                                                                                                                           |
|----|----------------|------|-----|----------------------------------------------------------------------------------------------------------|-----------------------------------------------------------------------------------------------------|------------------------------------------------------------------------------------------------------------------------------------|--------------------------------------------------------------------------------------------------------------------|---------------------------------------------------------------------------------------------------------------------------------------------------------------------------------------------------------------------------------------------------------------------------------------------------------------------------------------------------------------------------------------------------------------------------|
| 10 | Gibson et al.  | 2011 | B1  | <p><b>Context:</b><br/>North America (Canada)</p> <p><b>SP:</b> rural first nation community members</p> | Investigating perceptions of using videoconferencing for mental health services – telemental health | <p>Videoconferencing and telehealth</p> <p>Increasing access to healthcare services, client satisfaction, and decreased costs.</p> | <p>Interviews<br/><b>N= 59</b></p> <p>Quantitative analysis<br/><b>N= 53</b><br/><b>Response rate= Unknown</b></p> | <p><b>Perceptions e-Health adoption outcomes:</b><br/>e-Health not appropriate (-)<br/>Hard to establish trust (-)<br/>Other priorities (-)<br/>Concerns privacy (-)<br/>Concerns help in case of crisis (-)<br/>Increasing continuity (+)<br/>Increasing access (+)<br/>Reduction travel costs (+)<br/>Foreseeing technological problems (-)</p>                                                                         |
| 75 | Gilbert et al. | 2010 | A,E | <p><b>Context:</b><br/>North America (USA)</p> <p><b>SP:</b> rural and urban communities</p>             | Examining differences social media use rural and urban population                                   | <p>(Broadband) internet and social media</p> <p>Connecting people, bonding and bridging</p>                                        | <p>Content/Meta-analysis<br/><b>N= 4000</b><br/><b>Response rate= 84,55%</b></p>                                   | <p><b>Context factors in e-Health adoption (rural):</b><br/>Women (+)<br/>Limited broadband access<br/>Limited mobility<br/>Necessity of trust</p> <p><b>e-Health adoption outcomes (rural):</b><br/>Moving f2f friendships online (+)<br/>Meeting place (-)<br/>Sign up later<br/>Friends/comments (-)<br/>Login (+)<br/>Female most popular friend<br/>Closeness friends (+)<br/>Rural women's privacy measures (+)</p> |

|           |               |             |      |                                                                                                    |                                                                                     |                                                                                                           |                                                                                                   |                                                                                                                                                                                                                                                                                                                                                                                                                                                                                                                                                                                                                                                          |
|-----------|---------------|-------------|------|----------------------------------------------------------------------------------------------------|-------------------------------------------------------------------------------------|-----------------------------------------------------------------------------------------------------------|---------------------------------------------------------------------------------------------------|----------------------------------------------------------------------------------------------------------------------------------------------------------------------------------------------------------------------------------------------------------------------------------------------------------------------------------------------------------------------------------------------------------------------------------------------------------------------------------------------------------------------------------------------------------------------------------------------------------------------------------------------------------|
| 22/<br>23 | Hebert et al. | 2006 & 2004 | B1,C | <p><b>Context:</b><br/>North America (Canada)</p> <p><b>SP:</b> rural palliative care patients</p> | Examining readiness to use influencing use, Effects on Symptom management and costs | <p>Videoconferencing and telehealth</p> <p>Increasing access to healthcare, reducing healthcare costs</p> | <p>Survey<br/><b>N= 44</b><br/><b>Response rate= 13,75%</b></p> <p>Interviews<br/><b>N= 8</b></p> | <p><b>Context factors in e-Health adoption:</b><br/>Client motivation (+)<br/>Nurses willingness to learn (+)<br/>Alternative services (-)<br/>critical mass (+)<br/>Area size (-)</p> <p><b>Process factors in e-Health adoption:</b><br/>Management support (+)<br/>Communication (+)<br/>Experienced / regional team members<br/>Difficult integration work pattern (-)</p> <p><b>Content factors in e-Health adoption:</b><br/>User-friendliness (+)<br/>Technological failure (-)<br/>Complex services (-)</p> <p><b>e-Health adoption outcomes:</b><br/>Non-adoption (0)<br/>No effect (0)<br/>Perception calls interruption nurse routine (-)</p> |
|-----------|---------------|-------------|------|----------------------------------------------------------------------------------------------------|-------------------------------------------------------------------------------------|-----------------------------------------------------------------------------------------------------------|---------------------------------------------------------------------------------------------------|----------------------------------------------------------------------------------------------------------------------------------------------------------------------------------------------------------------------------------------------------------------------------------------------------------------------------------------------------------------------------------------------------------------------------------------------------------------------------------------------------------------------------------------------------------------------------------------------------------------------------------------------------------|

|    |                         |      |      |                                                                                                                                      |                                                                                                                                                      |                                                                                                                                                                                                                            |                                                                                                                               |                                                                                                                                                                                                                                                                                                                                                                                                                                                                                                                                                                              |
|----|-------------------------|------|------|--------------------------------------------------------------------------------------------------------------------------------------|------------------------------------------------------------------------------------------------------------------------------------------------------|----------------------------------------------------------------------------------------------------------------------------------------------------------------------------------------------------------------------------|-------------------------------------------------------------------------------------------------------------------------------|------------------------------------------------------------------------------------------------------------------------------------------------------------------------------------------------------------------------------------------------------------------------------------------------------------------------------------------------------------------------------------------------------------------------------------------------------------------------------------------------------------------------------------------------------------------------------|
| 60 | Hollifield et al.       | 2000 | B1,C | <p><b>Context:</b><br/>North America (USA)</p> <p><b>SP:</b><br/>businesses and residents in two project and control communities</p> | Examining whether rural telecommunications self-development projects were effective in encouraging local adoption of new telecommunications services | <p>(Broadband) internet and social media</p> <p>Empowering people by reducing social and cultural isolation and fostering economic development through implementing rural telecommunications self-development projects</p> | <p>Quasi-experiment</p> <p>Interviews<br/><b>N= Unknown</b></p> <p>Survey<br/><b>N= 471</b><br/><b>Response rate= 54%</b></p> | <p><b>Context factors in e-Health adoption:</b><br/>Self-employed (-)<br/>Employed by local company (-)</p> <p><b>Process factors in e-Health adoption:</b><br/>Rural telecommunications self-development projects are not more effective than when telecommunication access is left to market forces</p> <p><b>e-Health adoption outcomes:</b><br/>Small community residents using the internet/e-mail at least once (+)<br/>Small community businesses using the internet/e-mail at least once (-)<br/>Using internet/e-mail at work (+)<br/>Using company website (+)</p> |
| 59 | Hollifield, Donnermeyer | 2003 | A    | <p><b>Context:</b><br/>North America (USA)</p> <p><b>SP:</b><br/>individuals in four rural communities</p>                           | Examining variables that influenced rural residents comparatively early adoption of information technologies                                         | <p>(Broadband) internet and social media</p> <p>No intervention</p>                                                                                                                                                        | <p>Survey<br/><b>N= 471</b><br/><b>Response rate= 54%</b></p>                                                                 | <p><b>e-Health adoption outcomes:</b><br/>Employment by a company using specific information technology (+)<br/>Employment by a company using specific information technology and low educated (+)</p>                                                                                                                                                                                                                                                                                                                                                                       |

|    |        |      |        |                                                                                      |                                                                                  |                                                        |                                                                                                  |                                                                                                                                                                                                                                                                                                                                                                                                                                                                                                                                                                                                                                                     |
|----|--------|------|--------|--------------------------------------------------------------------------------------|----------------------------------------------------------------------------------|--------------------------------------------------------|--------------------------------------------------------------------------------------------------|-----------------------------------------------------------------------------------------------------------------------------------------------------------------------------------------------------------------------------------------------------------------------------------------------------------------------------------------------------------------------------------------------------------------------------------------------------------------------------------------------------------------------------------------------------------------------------------------------------------------------------------------------------|
| 79 | Hosman | 2010 | B1,C,D | <p><b>Context:</b><br/>Africa<br/>(Uganda)</p> <p><b>SP:</b> rural<br/>community</p> | Assessing conditions for introducing e-Health into primary and secondary schools | Computer lap<br><br>Increasing technological adoption. | <p>Multi-method case study:</p> <p>Interviews,<br/><b>N= Unknown</b></p> <p>Content analysis</p> | <p><b>Process factors in e-Health adoption:</b><br/>Setting realistic goals (+)<br/>Taking local context into account (+)<br/>Modest project size (+)<br/>External (financial) support (+)<br/>Training (both professionals and teachers) (+)<br/>Project champion (+)<br/>Bottom up and top down feedback loops (+)<br/>Language barriers (-)<br/>Limited capacity (-)</p> <p><b>Content factors in e-Health adoption:</b><br/>View e-Health as complementary instead of goal (+)<br/>Sustainability</p> <p><b>e-Health adoption outcomes:</b><br/>Target group uses computers (+)<br/>Enhancing learning (+)<br/>Supporting local economy (+)</p> |
|----|--------|------|--------|--------------------------------------------------------------------------------------|----------------------------------------------------------------------------------|--------------------------------------------------------|--------------------------------------------------------------------------------------------------|-----------------------------------------------------------------------------------------------------------------------------------------------------------------------------------------------------------------------------------------------------------------------------------------------------------------------------------------------------------------------------------------------------------------------------------------------------------------------------------------------------------------------------------------------------------------------------------------------------------------------------------------------------|

|    |                  |      |     |                                                                                                          |                                                                                                                                                           |                                                                                                                                                                                                                          |                                                                                                         |                                                                                                                                                                                                                                                                                                                                                                                                                                                                                                                                 |
|----|------------------|------|-----|----------------------------------------------------------------------------------------------------------|-----------------------------------------------------------------------------------------------------------------------------------------------------------|--------------------------------------------------------------------------------------------------------------------------------------------------------------------------------------------------------------------------|---------------------------------------------------------------------------------------------------------|---------------------------------------------------------------------------------------------------------------------------------------------------------------------------------------------------------------------------------------------------------------------------------------------------------------------------------------------------------------------------------------------------------------------------------------------------------------------------------------------------------------------------------|
| 74 | Hosman, Fife     | 2008 | C,D | <p><b>Context:</b> Asia (Sri Lanka)</p> <p><b>SP:</b> rural communities</p>                              | Exploring ways to design projects that are sustainable, enable long-term e-Health adoption an improve quality of life through public private partnerships | <p>(Broadband) internet and social media</p> <p>Encouraging local entrepreneurship and offering a variety of value adding training courses to address the socio economic desires of the local technology recipients.</p> | Case study                                                                                              | <p><b>Process factors in e-Health adoption:</b></p> <p>Pilot project (in line with local realities, flexible)</p> <p>Third party intermediary (managing stakeholders, solid contract, sustainability)</p> <p>Bottom-up for need based approach (including understanding of societal norms, literacy levels, employment options, weather-related concerns, factional/religious/ethnic sensitivities, government openness or repression)</p> <p><b>Content factors in e-Health adoption:</b></p> <p>Services should be useful</p> |
| 11 | Jayaraman et al. | 2008 | A,C | <p><b>Context:</b> Australia (New Zealand)</p> <p><b>SP:</b> rural patients and health professionals</p> | Assessing usefulness and access to mobile phone cameras for diagnosing in primary care                                                                    | <p>Telecommunication (mobiles)</p> <p>Assessing the clinical usefulness of mobile phone cameras</p>                                                                                                                      | <p>Survey<br/><b>N= 480</b><br/><b>Response rate= Unknown</b></p> <p>Clinical quiz<br/><b>N= 30</b></p> | <p><b>Context factors in e-Health adoption:</b></p> <p>Maori-ethnicity (+)</p> <p>Age (-)</p> <p>Access (+)</p> <p>Motivation (+)</p> <p><b>e-Health adoption outcomes:</b></p> <p>Increasing confidence in medical diagnose</p>                                                                                                                                                                                                                                                                                                |

|    |                    |      |             |                                                                            |                                                                                                               |                                                                                                                                                                                  |                                                                                                                     |                                                                                                                                                                                                                                                                                                                                                                                                                                                                                                                                                 |
|----|--------------------|------|-------------|----------------------------------------------------------------------------|---------------------------------------------------------------------------------------------------------------|----------------------------------------------------------------------------------------------------------------------------------------------------------------------------------|---------------------------------------------------------------------------------------------------------------------|-------------------------------------------------------------------------------------------------------------------------------------------------------------------------------------------------------------------------------------------------------------------------------------------------------------------------------------------------------------------------------------------------------------------------------------------------------------------------------------------------------------------------------------------------|
| 80 | Kanungo            | 2004 | B1,B2,<br>C | <b>Context:</b> Asia<br>(India)<br><br><b>SP:</b> rural<br>community       | Examining<br>conditions for<br>building<br>emancipating e-<br>Health                                          | Community networks<br><br>Decreasing the<br>information poverty                                                                                                                  | Interviews<br><b>N= Unknown</b>                                                                                     | <b>Context factors in e-Health<br/>adoption:</b><br>Clear government structures,<br>local social structures may<br>hinder even diffusion of e-<br>Health adoption throughout<br>community (due to i.e.<br>literacy levels, time<br>constraints)<br><b>Process factors in e-Health<br/>adoption:</b><br>Local, specific, community<br>owned, partnerships<br><b>Context factors in e-Health<br/>adoption:</b><br>Need based<br><b>e-Health adoption<br/>outcomes:</b><br>Informing/knowledge<br>sharing<br>Market access<br>Changed social order |
| 68 | Kivunike et<br>al. | 2011 | A,C         | <b>Context:</b><br>Africa<br>(Uganda)<br><br><b>SP:</b> rural<br>community | Exploring<br>perceptions of e-<br>Health effecting<br>quality of life in<br>relation to e-<br>Health adoption | (Broadband) internet<br>and social media,<br>telecommunication<br>(mobiles)<br><br>Fostering economic<br>growth,<br>modernization and<br>people centered or<br>human development | Multi-<br>method:<br><br>Interviews<br><b>N= 22</b><br><br>Survey<br><b>N= 454</b><br><b>Response<br/>rate= 98%</b> | <b>Context factors in e-Health<br/>adoption:</b><br>Perception of self (to old -)<br>Availability (+)<br>Education (+)<br>Perceived usefulness/need<br>(+)<br><b>e-Health adoption<br/>outcomes:</b><br>Spam (-)<br>Time constrains (-)<br>Appropriation (Using e-                                                                                                                                                                                                                                                                              |

|    |             |      |     |                                                             |                                                                                                        |                                                                                              |                                                                         |                                                                                                                                                                                                                                                                                                                                                                                                                                                                                      |
|----|-------------|------|-----|-------------------------------------------------------------|--------------------------------------------------------------------------------------------------------|----------------------------------------------------------------------------------------------|-------------------------------------------------------------------------|--------------------------------------------------------------------------------------------------------------------------------------------------------------------------------------------------------------------------------------------------------------------------------------------------------------------------------------------------------------------------------------------------------------------------------------------------------------------------------------|
|    |             |      |     |                                                             |                                                                                                        |                                                                                              |                                                                         | Health for entertainment and communication rather than education)                                                                                                                                                                                                                                                                                                                                                                                                                    |
| 76 | Kumar, Best | 2006 | A,C | <p><b>Context:</b> Asia (India)</p> <p><b>SP:</b> Users</p> | Examining why kiosk use has not been able to diffuse among a wider section of the community population | <p>Community networks</p> <p>Supporting rural social, economic and political development</p> | <p>Survey</p> <p><b>N= 132</b></p> <p><b>Response rate= Unknown</b></p> | <p><b>Context factors in e-Health adoption:</b></p> <p>Age (-)</p> <p>Male (+)</p> <p>Students (+)</p> <p>Education (+)</p> <p>Income (+)</p> <p>Status community of origin (+)</p> <p><b>Process factors in e-Health adoption:</b></p> <p>Local champions (+)</p> <p><b>Content factors in e-Health adoption:</b></p> <p>Accessibility as centers are located close to economically backward neighborhoods (- existing socio-economic inequalities)</p> <p>Localized content(+)</p> |

|    |               |      |          |                                                                                                           |                                                                                                                         |                                                                            |                                                                     |                                                                                                                                                                                                                                                                                                                                                                                                                                                                                                                     |
|----|---------------|------|----------|-----------------------------------------------------------------------------------------------------------|-------------------------------------------------------------------------------------------------------------------------|----------------------------------------------------------------------------|---------------------------------------------------------------------|---------------------------------------------------------------------------------------------------------------------------------------------------------------------------------------------------------------------------------------------------------------------------------------------------------------------------------------------------------------------------------------------------------------------------------------------------------------------------------------------------------------------|
| 57 | LaRose et al. | 2007 | A        | <p><b>Context:</b><br/>North America ( USA)</p> <p><b>SP:</b><br/>residents of four rural communities</p> | Examining factors that cause broadband Internet service adoption in rural communities                                   | (Broadband) internet and social media<br><br>Providing access to broadband | Survey<br><b>N= Unknown</b><br><b>Response rate= between 20-47%</b> | <p><b>Context factors in e-Health adoption:</b><br/>Prior internet experience (+)<br/>The expected outcomes of broadband usage (+)<br/>Direct personal experience with broadband (+)<br/>Self-efficacy (+)<br/>Age (-)<br/>Income (+)<br/>Education (0)<br/>Ethnicity (0)</p>                                                                                                                                                                                                                                       |
| 58 | LaRose et al. | 2011 | B1,B2, C | <p><b>Context:</b><br/>North America ( USA)</p> <p><b>SP:</b> rural residents</p>                         | Examining adoption; awareness, perceptions and intentions to use; personal economic development; Community satisfaction | (Broadband) internet and social media<br><br>Providing access to broadband | Survey<br><b>N= Unknown</b><br><b>Response rate= Unknown</b>        | <p><b>Context factors in e-Health adoption:</b><br/>ICT experience/ownership (+)</p> <p><b>Process factors in e-Health adoption:</b><br/>Community education (+)<br/>Grant (mixed results)<br/>Offering to build public broadband attracts private investors</p> <p><b>e-Health adoption outcomes:</b><br/>Positive perceptions broadband benefit (+)<br/>Pers.business initiatives (0)<br/>Community satisfaction level (0)<br/>Broadband awareness (0)<br/>Intention to use (0)<br/>Broadband perceptions (+)</p> |

|    |                    |      |      |                                                                                                                   |                                                                                                            |                                                                                                                            |                                                      |                                                                                                                                                                                                                                                                                                                                            |
|----|--------------------|------|------|-------------------------------------------------------------------------------------------------------------------|------------------------------------------------------------------------------------------------------------|----------------------------------------------------------------------------------------------------------------------------|------------------------------------------------------|--------------------------------------------------------------------------------------------------------------------------------------------------------------------------------------------------------------------------------------------------------------------------------------------------------------------------------------------|
| 69 | Lear et al.        | 2009 | A    | <p><b>Context:</b><br/>South America (Columbia)</p> <p><b>SP:</b> rural, agglomeration, and metropolitan area</p> | Determining determinants of internet use/patterns of internet use for patients with cardiovascular disease | <p>(Broadband) internet and social media</p> <p>Developing ways to deal with increased demand on health care services.</p> | Interviews<br><b>N= 294</b>                          | <p><b>Context factors in e-Health adoption:</b><br/>Geographical isolation (-)<br/>Computer ownership (+)<br/>Gender (Men)<br/>Age (-)<br/>Income (+)<br/>Education (+)<br/>Marital status (Married)<br/>Need for information</p> <p><b>e-Health adoption outcomes:</b><br/>understanding disease (+)<br/>Informed decision making (+)</p> |
| 89 | Madoc-Jones et al. | 2007 | B1,C | <p><b>Context:</b><br/>Europe (UK)</p> <p><b>SP:</b> parents from local school</p>                                | Examining perceptions of telephone support service                                                         | <p>Telecommunication (mobiles)</p> <p>Providing cheap additional educational services</p>                                  | Interviews<br><b>N= 26</b>                           | <p><b>Process factors in e-Health adoption:</b><br/>Initial f2f meeting (+)<br/>Need based, one-to-one communication (+)<br/>Skilled operators (+)<br/>Call schedules fitting client planning (+)<br/>Desire non-time delineated support (-)</p> <p><b>e-Health adoption outcomes:</b><br/>Anxiety (-)<br/>Depression/despair (-)</p>      |
| 85 | Mars               | 2010 | A    | <p><b>Context:</b><br/>North America (USA)</p> <p><b>SP:</b> Indian reservation</p>                               | Accessing email and internet for families of disabled Native Americans                                     | <p>(Broadband) internet and social media</p> <p>No intervention</p>                                                        | Survey<br><b>N= 708</b><br><b>Response rate= 66%</b> | <p><b>e-Health adoption outcomes:</b><br/>Computer ownership levels<br/>Frequency of use</p>                                                                                                                                                                                                                                               |

|    |                |      |        |                                                                                          |                                                                                                                                |                                                                                |                                                                                                                       |                                                                                                                                                                                                                                                                                                                                                                                                                            |
|----|----------------|------|--------|------------------------------------------------------------------------------------------|--------------------------------------------------------------------------------------------------------------------------------|--------------------------------------------------------------------------------|-----------------------------------------------------------------------------------------------------------------------|----------------------------------------------------------------------------------------------------------------------------------------------------------------------------------------------------------------------------------------------------------------------------------------------------------------------------------------------------------------------------------------------------------------------------|
| 91 | McInerney      | 2005 | A,C    | <p><b>Context:</b><br/>Europe (Ireland)</p> <p><b>SP:</b> local school</p>               | Describing process of incorporating technology into school curriculum                                                          | Computer lab<br><br>Enhancing the teaching, learning and curriculum experience | <p>Multi-method:</p> <p>Interviews<br/><b>N= 94</b></p> <p>Survey<br/><b>N= 360</b><br/><b>Response rate= 45%</b></p> | <p><b>Process factors in e-Health adoption:</b><br/>Workshops (+)<br/>High levels of voluntarism (+)<br/>Pilot, expand later (+)<br/>Champions (+)<br/>Self-education/experimentation (+)<br/>Training (+)<br/>Student mentors (+)<br/>Work pressure teachers (-)</p> <p><b>Content factors in e-Health adoption:</b><br/>No appropriate software for Children with special needs (-)</p>                                  |
| 70 | McQuaid et al. | 2004 | A,B1,C | <p><b>Context:</b><br/>Europe (Scotland)</p> <p><b>SP:</b> jobseekers in rural areas</p> | Assessing utility e-Health as information service unemployed people (rural and urban) based on their experiences and attitudes | Web portal<br><br>Improving the ability for the unemployed to search for jobs  | <p>Multi-method:</p> <p>Interviews<br/><b>N=424</b></p> <p>Survey<br/><b>N= 300</b><br/><b>Response rate= 22%</b></p> | <p><b>Context factors in e-Health adoption:</b><br/>Unemployed (-)<br/>Age (-)<br/>Negative attitudes (-)<br/>Perceived technical skills (+)<br/>Technical skills (+)<br/>Education (+)<br/>Income (+)<br/>Accessibility (+)</p> <p><b>Process factors in e-Health adoption:</b><br/>Adjust to needs (+)<br/>local dimension services (+)<br/>Training (+)<br/>Number of vacancies (+)<br/>Contact agencies-indiv. (-)</p> |

|    |                    |      |   |                                                                                        |                                 |                                                                                              |                                                                 |                                                                                                                                                                                                                                                                                                                                                                                                                                                                                                                                                                                                                                                                          |
|----|--------------------|------|---|----------------------------------------------------------------------------------------|---------------------------------|----------------------------------------------------------------------------------------------|-----------------------------------------------------------------|--------------------------------------------------------------------------------------------------------------------------------------------------------------------------------------------------------------------------------------------------------------------------------------------------------------------------------------------------------------------------------------------------------------------------------------------------------------------------------------------------------------------------------------------------------------------------------------------------------------------------------------------------------------------------|
| 71 | Michailidis et al. | 2011 | A | <p><b>Context:</b><br/>Europe (Greece)</p> <p><b>SP:</b> Rural heads of households</p> | Classifying internet user types | <p>(Broadband) internet and social media</p> <p>Increasing flexibility and affordability</p> | <p>Survey<br/><b>N= 920</b><br/><b>Response rate= 36,8%</b></p> | <p><b>Context factors in e-Health adoption:</b><br/>Previous ICT experience (+)<br/>Skills (+)<br/>Need/Necessity (+)<br/>Fear (-)<br/>Income (+)<br/>Proximity urban area (+)<br/>Household includes kids &lt;18 (+)<br/>Age (-)<br/>Education (+)<br/>Employees (&gt;4 +)</p> <p><b>Process factors in e-Health adoption:</b><br/>work with local communities (+)<br/>create need (+)<br/>Vocational training (+)<br/>New insights in technology</p> <p><b>Content factors in e-Health adoption:</b><br/>Availability (+)<br/>Costs/time loss (-)</p> <p><b>e-Health adoption outcomes:</b><br/>Basic users<br/>Socially interactive users<br/>Farm oriented users</p> |
|----|--------------------|------|---|----------------------------------------------------------------------------------------|---------------------------------|----------------------------------------------------------------------------------------------|-----------------------------------------------------------------|--------------------------------------------------------------------------------------------------------------------------------------------------------------------------------------------------------------------------------------------------------------------------------------------------------------------------------------------------------------------------------------------------------------------------------------------------------------------------------------------------------------------------------------------------------------------------------------------------------------------------------------------------------------------------|

|           |                  |      |       |                                                                                        |                                                                                                                                                          |                                                                                             |                                                                                                                                                                       |                                                                                                                                                                                                                                       |
|-----------|------------------|------|-------|----------------------------------------------------------------------------------------|----------------------------------------------------------------------------------------------------------------------------------------------------------|---------------------------------------------------------------------------------------------|-----------------------------------------------------------------------------------------------------------------------------------------------------------------------|---------------------------------------------------------------------------------------------------------------------------------------------------------------------------------------------------------------------------------------|
| <b>83</b> | Pendleton et al. | 2008 | B1,C  | <b>Context:</b><br>North America (USA)<br><br><b>SP:</b><br>Teenagers                  | Examining satisfaction HIV/STD intervention f2f versus long distance                                                                                     | Videoconferencing and telehealth<br><br>Finding efficient manner to discuss crucial topics. | Survey<br><b>N= 571</b><br><b>Response rate= Unknown</b>                                                                                                              | <b>Process factors in e-Health adoption:</b><br>Initial f2f meeting<br><b>e-Health adoption outcomes:</b><br>Leadership (-)<br>Warmth/connection (-)<br>Clarity (-)<br>Comfortability (-)<br>Exchange socio-emotional information (-) |
| <b>87</b> | Pigg and Crank   | 2005 | B1,B2 | <b>Context:</b><br>North America (USA)<br><br><b>SP:</b> Five communities              | Investigating impact of the development of ICT in rural communities that have based their local economic development strategy on the availability of ICT | (Broadband) internet and social media<br><br>Developing technological infrastructure        | Case studies<br><br>Semi-structured interviews<br><b>N= Unknown</b><br>Content analysis                                                                               | <b>e-Health adoption outcomes:</b><br>Economic growth (0)                                                                                                                                                                             |
| <b>90</b> | Reid et al.      | 1998 | B1    | <b>Context:</b><br>North America (Canada)<br><br><b>SP:</b><br>Physicians and patients | Providing and evaluating telemedicine services for rural physicians and patients in Nova Scotia                                                          | Videoconferencing and telehealth<br><br>Providing patient care at limit cost                | Longitudinal study<br><br>Surveys<br><b>N= Unknown</b><br>Focus groups<br><b>N= Unknown</b><br>Interviews with practitioners<br><b>N= Unknown</b><br>Content analysis | <b>e-Health adoption outcomes:</b><br>Patient care (+/0)<br>Accessibility care (+)<br>Costs (-)                                                                                                                                       |

|    |                  |      |     |                                                                                                                                 |                                                                                                                                    |                                                                                                                                        |                                                                                                                                                                   |                                                                                                                                                                                                                                                                                                                                                          |
|----|------------------|------|-----|---------------------------------------------------------------------------------------------------------------------------------|------------------------------------------------------------------------------------------------------------------------------------|----------------------------------------------------------------------------------------------------------------------------------------|-------------------------------------------------------------------------------------------------------------------------------------------------------------------|----------------------------------------------------------------------------------------------------------------------------------------------------------------------------------------------------------------------------------------------------------------------------------------------------------------------------------------------------------|
| 50 | Riedel et al.    | 1998 | A   | <p><b>Context:</b><br/>North America (USA)</p> <p><b>SP:</b> rural community</p>                                                | Assessing impact electronic community on social capital and electronic democracy                                                   | Community networks<br><br>Increasing access to information, enhancing their economic and social capabilities.                          | <p>Multi-method:</p> <p>Interviews<br/><b>N= Unknown</b></p> <p>Survey<br/><b>N= 2000</b><br/><b>Response rate= 40%</b></p>                                       | <p><b>Context factors in e-Health adoption:</b><br/>Household with kids &lt;18<br/>Aged &lt;55<br/>Computer usage (+)<br/>Computer ownership (+)<br/>Computer training -&gt; computer comfort (+)<br/>Support political active citizens (+)</p> <p><b>Process factors in e-Health adoption:</b><br/>Build on top of pre-existing social networks (+)</p> |
| 84 | Rubinoff         | 2005 | C,E | <p><b>Context:</b><br/>Latin America</p> <p><b>SP:</b> Female community leaders participating in the project, Project staff</p> | Showing that the analysis of increasingly complex cybernetworked development efforts can benefit from a the actor network approach | Community networks<br><br>Strengthening communication, women's empowerment through creation of online life histories of female leaders | <p>Feminist research methodology</p> <p>Participant interviews<br/><b>N= 21</b></p> <p>Project staff interviews<br/><b>N= Unknown</b></p> <p>Content analysis</p> | <p><b>Process factors in e-Health adoption:</b><br/>Sometimes multiple actors were involved in the creation of life histories.</p> <p><b>Content factors in e-Health adoption:</b><br/>Project delivered privacy sensitive content<br/>Project delivered subjective content</p>                                                                          |
| 66 | Schmeida, McNeal | 2007 | A   | <p><b>Context:</b><br/>North America (USA)</p> <p><b>SP:</b> Users of a certain website</p>                                     | Examining disparities accessing health information through internet                                                                | Web portal<br><br>Providing specified healthcare information                                                                           | <p>Survey<br/><b>N= 2928</b><br/><b>Response rate= 72,2%</b></p>                                                                                                  | <p><b>e-Health adoption:</b><br/>Home internet access (+)<br/>Age (+)<br/>Income (-)<br/>Duration internet access (+)</p>                                                                                                                                                                                                                                |

|    |                 |      |     |                                                                                               |                                                                                 |                                                                                                                                      |                                                                     |                                                                                                                                                                                                                                                                                                                                                                                                                                                           |
|----|-----------------|------|-----|-----------------------------------------------------------------------------------------------|---------------------------------------------------------------------------------|--------------------------------------------------------------------------------------------------------------------------------------|---------------------------------------------------------------------|-----------------------------------------------------------------------------------------------------------------------------------------------------------------------------------------------------------------------------------------------------------------------------------------------------------------------------------------------------------------------------------------------------------------------------------------------------------|
| 12 | Shaw et al.     | 2008 | A,E | <p><b>Context:</b><br/>North America (USA)</p> <p><b>SP:</b> rural breast cancer patients</p> | Investigating psycho-social factors influencing use and type of use of e-Health | <p>Web portal</p> <p>Providing specified healthcare information</p>                                                                  | <p>Survey</p> <p><b>N= 144</b></p> <p><b>Response rate= 92%</b></p> | <p><b>Context factors in e-Health adoption:</b></p> <p>Need for information (+)</p> <p>Negative emotions (+)</p> <p>Perceived barrier to information (+)</p> <p>Worse condition (+)</p> <p>Perceived social support (-)</p> <p>Emotional wellbeing (-)</p> <p>Sense of competence/self-efficacy (+)</p> <p>Coping mechanism (+)</p> <p>Reduced functional wellbeing (-)</p> <p><b>e-Health adoption outcomes:</b></p> <p>Preference experiential data</p> |
| 13 | Shepherd et al. | 2006 | B1  | <p><b>Context:</b><br/>Australia</p> <p><b>SP:</b> rural cancer patients</p>                  | Assessing effect of telepsychology on anxiety, depression and quality of life   | <p>Videoconferencing and telehealth</p> <p>Providing mental supporting services, increasing healthcare quality, decreasing costs</p> | <p>Survey</p> <p><b>N= 34</b></p> <p><b>Response rate= 74%</b></p>  | <p><b>Context factors in e-Health adoption:</b></p> <p>Lack of specialist care/treatment options (+)</p> <p>Geographical isolation (+)</p> <p>Desire to be anonymous (+)</p> <p>Effect of Context factors in e-Health adoption:</p> <p>Travel costs (-)</p> <p>Anxiety (-)</p> <p>Depression (-)</p> <p>Quality of life (Functional and emotional wellbeing) (+)</p> <p>Physical wellbeing (0/+)</p> <p>Social wellbeing (0/+)</p>                        |

|    |      |      |     |                                                                                                                  |                                                                                           |                                                                                                                          |                            |                                                                                                                                                                                                                                                                                                                                                                                                                                                                                         |
|----|------|------|-----|------------------------------------------------------------------------------------------------------------------|-------------------------------------------------------------------------------------------|--------------------------------------------------------------------------------------------------------------------------|----------------------------|-----------------------------------------------------------------------------------------------------------------------------------------------------------------------------------------------------------------------------------------------------------------------------------------------------------------------------------------------------------------------------------------------------------------------------------------------------------------------------------------|
| 25 | Shin | 2008 | C,D | <p><b>Context:</b><br/>North America (USA)</p> <p><b>SP:</b> rural community and its variety of stakeholders</p> | Investigating development, discourse, design of community network and social interactions | <p>(Broadband) internet and social media</p> <p>Preparing the community for future economic and social opportunities</p> | Interviews<br><b>N= 66</b> | <p><b>Process factors in e-Health adoption:</b><br/>Community consensus/Alignment of ideas (+)<br/>Communication project plan to community (-)<br/>Mediating role (+)<br/>Regulatory obstacles (-)<br/>Not involving all stakeholders in decision process(-)<br/>Emphasis of project's technological above community needs<br/>Organizational politics (-)</p> <p><b>Content factors in e-Health adoption:</b><br/>Need-based (+)<br/>Lack of technical and financial resources (-)</p> |
|----|------|------|-----|------------------------------------------------------------------------------------------------------------------|-------------------------------------------------------------------------------------------|--------------------------------------------------------------------------------------------------------------------------|----------------------------|-----------------------------------------------------------------------------------------------------------------------------------------------------------------------------------------------------------------------------------------------------------------------------------------------------------------------------------------------------------------------------------------------------------------------------------------------------------------------------------------|

|    |              |      |     |                                                                                |                                                                                                          |                                                                                                           |                                                                                                                                      |                                                                                                                                                                                                                                                                                                                                                                                                                                                                                                                                                                           |
|----|--------------|------|-----|--------------------------------------------------------------------------------|----------------------------------------------------------------------------------------------------------|-----------------------------------------------------------------------------------------------------------|--------------------------------------------------------------------------------------------------------------------------------------|---------------------------------------------------------------------------------------------------------------------------------------------------------------------------------------------------------------------------------------------------------------------------------------------------------------------------------------------------------------------------------------------------------------------------------------------------------------------------------------------------------------------------------------------------------------------------|
| 14 | Simms et al. | 2011 | A,C | <p><b>Context:</b><br/>North America (Canada)</p> <p><b>SP:</b> clinicians</p> | Identifying factors associated with practitioners telemental health use, perceptions and barriers to use | <p>Videoconferencing and telehealth</p> <p>Increasing healthcare access and reducing healthcare costs</p> | <p>Multi-method:</p> <p>Interviews<br/><b>N= 25</b></p> <p>Survey<br/><b>N= 160</b><br/><b>Response rate=</b><br/><b>Unknown</b></p> | <p><b>Context factors in e-Health adoption:</b><br/>Illness symptoms (emotional unstable, impulsive, poor coping skills, cognitive impairments, psychotics, paranoia, particular mental illness)<br/>Impaired physical abilities (-)<br/>Trust issues (-)<br/>Infrastructure (+)<br/>Accessibility (+)<br/>ICT experience (+)<br/>Age (-)<br/>Perceived user-friendliness</p> <p><b>Process factors in e-Health adoption:</b><br/>Facilitating emergency help<br/>Training<br/>Building trust</p> <p><b>Content factors in e-Health adoption:</b><br/>Lack of funding</p> |
|----|--------------|------|-----|--------------------------------------------------------------------------------|----------------------------------------------------------------------------------------------------------|-----------------------------------------------------------------------------------------------------------|--------------------------------------------------------------------------------------------------------------------------------------|---------------------------------------------------------------------------------------------------------------------------------------------------------------------------------------------------------------------------------------------------------------------------------------------------------------------------------------------------------------------------------------------------------------------------------------------------------------------------------------------------------------------------------------------------------------------------|

|    |              |      |   |                                                                                                                             |                                                                                                  |                                                                                                                            |                                                         |                                                                                                                                                                                                                                                                                                                                                                                                                                                    |
|----|--------------|------|---|-----------------------------------------------------------------------------------------------------------------------------|--------------------------------------------------------------------------------------------------|----------------------------------------------------------------------------------------------------------------------------|---------------------------------------------------------|----------------------------------------------------------------------------------------------------------------------------------------------------------------------------------------------------------------------------------------------------------------------------------------------------------------------------------------------------------------------------------------------------------------------------------------------------|
| 81 | Singh et al. | 2010 | C | <p><b>Context:</b><br/>North America (USA)</p> <p><b>SP:</b> principal actors associated with the telehealth initiative</p> | Assessing possibilities for sustainable adoption of e-Health by rural public health institutions | <p>Videoconferencing and telehealth</p> <p>Increasing access to and improvement of healthcare services in rural areas.</p> | Interviews<br><b>N= 25</b>                              | <p><b>Process factors in e-Health adoption:</b><br/>f2f still possible (+)<br/>Leadership skills (+)<br/>Support funding agencies (+)<br/>Independent telehealth network<br/>Collaboration health institute, rural community and external partners</p> <p><b>Context factors in e-Health adoption:</b><br/>Outreach clinics (+)<br/>Costs (-)</p> <p><b>e-Health adoption outcomes:</b><br/>Access to new services<br/>Decrease nurse turnover</p> |
| 72 | Sørensen     | 2008 | A | <p><b>Context:</b><br/>Europe (Denmark)</p> <p><b>SP:</b> heads of rural households</p>                                     | Examining attitudes towards e-Health                                                             | <p>Videoconferencing and telehealth</p> <p>Increasing access to healthcare services in rural areas.</p>                    | Survey<br><b>N= 1000</b><br><b>Response rate= 64,3%</b> | <p><b>Context factors in e-Health adoption:</b><br/>Age (18-29, +)<br/>Education (+)</p> <p><b>e-Health adoption outcomes:</b><br/>Reluctance applications<br/>patient-doctor procedures</p>                                                                                                                                                                                                                                                       |

|    |       |      |     |                                                                                          |                                                                                                                                                                        |                                                                                                           |                                                                |                                                                                                                                                                                                                                                                                                                                                                                                |
|----|-------|------|-----|------------------------------------------------------------------------------------------|------------------------------------------------------------------------------------------------------------------------------------------------------------------------|-----------------------------------------------------------------------------------------------------------|----------------------------------------------------------------|------------------------------------------------------------------------------------------------------------------------------------------------------------------------------------------------------------------------------------------------------------------------------------------------------------------------------------------------------------------------------------------------|
| 54 | Stern | 2008 | A,E | <p><b>Context:</b><br/>North America (USA)</p> <p><b>SP:</b> rural community members</p> | <p>Defining modes of communication between rural individuals and three closest friends, looking at social tie locality, frequency of communication, internet usage</p> | <p>(Broadband) internet and social media</p> <p>Increasing the degree of communication between people</p> | <p>Survey<br/><b>N= 1315</b><br/><b>Response rate= 69%</b></p> | <p><b>Context factors in e-Health adoption:</b><br/>Alternative media (-)<br/>low access (-)<br/>local friends/f2f com (-)<br/>Age (-)<br/>Competence<br/>Effect Context factors in e-Health adoption:<br/>The more people use the internet, the more likely they are to use email in contact with close friends (both local and non-local), only if persons are proficient with internet.</p> |
|----|-------|------|-----|------------------------------------------------------------------------------------------|------------------------------------------------------------------------------------------------------------------------------------------------------------------------|-----------------------------------------------------------------------------------------------------------|----------------------------------------------------------------|------------------------------------------------------------------------------------------------------------------------------------------------------------------------------------------------------------------------------------------------------------------------------------------------------------------------------------------------------------------------------------------------|

|    |              |      |      |                                                                                          |                                                                                                  |                                                                                                                                                                                      |                                                                      |                                                                                                                                                                                                                                                                                                                                                                                                                                                                                                                                                                                                            |
|----|--------------|------|------|------------------------------------------------------------------------------------------|--------------------------------------------------------------------------------------------------|--------------------------------------------------------------------------------------------------------------------------------------------------------------------------------------|----------------------------------------------------------------------|------------------------------------------------------------------------------------------------------------------------------------------------------------------------------------------------------------------------------------------------------------------------------------------------------------------------------------------------------------------------------------------------------------------------------------------------------------------------------------------------------------------------------------------------------------------------------------------------------------|
| 55 | Stern, Adams | 2010 | A,B2 | <p><b>Context:</b><br/>North America (USA)</p> <p><b>SP:</b> rural community members</p> | Assessing how people use internet to maintain local social networks/learn about local activities | <p>(Broadband) internet and social media</p> <p>Increasing the degree of communication between people in which knowledge of community members about local activities is enhanced</p> | <p>Survey</p> <p><b>N= 1315</b></p> <p><b>Response rate= 69%</b></p> | <p><b>Context factors in e-Health adoption:</b></p> <p>Non-local ties (+)</p> <p>Local leadership and participation (+)</p> <p>Local ties (-)</p> <p>Religious groups (-)</p> <p>lack of skills (-)</p> <p>Alternative media (-)</p> <p>Negative perceptions of ICT among non-users (-)</p> <p><b>Content factors in e-Health adoption:</b></p> <p>Non user friendly (-)</p> <p>Fulfilling a specific need (+)</p> <p><b>e-Health adoption outcomes:</b></p> <p>Internet for bonding (mostly) and bridging</p> <p>Activating the active</p> <p>Email rather than website fosters community interaction</p> |
|----|--------------|------|------|------------------------------------------------------------------------------------------|--------------------------------------------------------------------------------------------------|--------------------------------------------------------------------------------------------------------------------------------------------------------------------------------------|----------------------------------------------------------------------|------------------------------------------------------------------------------------------------------------------------------------------------------------------------------------------------------------------------------------------------------------------------------------------------------------------------------------------------------------------------------------------------------------------------------------------------------------------------------------------------------------------------------------------------------------------------------------------------------------|

|    |                 |      |      |                                                                                          |                                                                                                                                     |                                                                                                                             |                                                                        |                                                                                                                                                                                                                                                                                                                                                                                                                                                                               |
|----|-----------------|------|------|------------------------------------------------------------------------------------------|-------------------------------------------------------------------------------------------------------------------------------------|-----------------------------------------------------------------------------------------------------------------------------|------------------------------------------------------------------------|-------------------------------------------------------------------------------------------------------------------------------------------------------------------------------------------------------------------------------------------------------------------------------------------------------------------------------------------------------------------------------------------------------------------------------------------------------------------------------|
| 56 | Stern, Dillman  | 2006 | A,B2 | <p><b>Context:</b><br/>North America (USA)</p> <p><b>SP:</b> rural community members</p> | Investigating involvement in local community activities, community leadership, local affective relationships affecting internet use | <p>(Broadband) internet and social media</p> <p>Increasing the degree of communication between people</p>                   | <p>Survey</p> <p><b>N= 1315</b></p> <p><b>Response rate= 69%</b></p>   | <p><b>Context factors in e-Health adoption:</b></p> <p>Age (-)</p> <p>Education (+)</p> <p>Marital status (married)</p> <p>Income (+)</p> <p><b>e-Health adoption outcomes:</b></p> <p>Participation community events (0)</p> <p>Participation community groups (+)</p> <p>Participation community change (+)</p> <p>Being a leader (+)</p> <p>Non-local ties (+)</p> <p>Internet used to organize those who are already civically engaged/with external network contacts</p> |
| 51 | Sullivan et al. | 2002 | A    | <p><b>Context:</b><br/>North America (USA)</p> <p><b>SP:</b> rural community</p>         | Identifying individual and community characteristics influencing e-Health content                                                   | <p>Community networks</p> <p>Providing a foundation to enhance the community's economic, political and social resources</p> | <p>Survey</p> <p><b>N= 805</b></p> <p><b>Response rate= 40,25%</b></p> | <p><b>Context factors in e-Health adoption:</b></p> <p>Household with kids &lt;18</p> <p>Aged &lt;55</p> <p>Computer usage (+)</p> <p>Computer ownership (+)</p> <p>Computer training -&gt; computer comfort (+)</p> <p><b>Process factors in e-Health adoption:</b></p> <p>Support political active citizens (+)</p> <p>Build on top of pre-existing social networks (+)</p>                                                                                                 |

|    |                |      |      |                                                                             |                                                                                                                                                                       |                                                                                                                          |                            |                                                                                                                                                                                                                                                                                                                                                                                                                                                         |
|----|----------------|------|------|-----------------------------------------------------------------------------|-----------------------------------------------------------------------------------------------------------------------------------------------------------------------|--------------------------------------------------------------------------------------------------------------------------|----------------------------|---------------------------------------------------------------------------------------------------------------------------------------------------------------------------------------------------------------------------------------------------------------------------------------------------------------------------------------------------------------------------------------------------------------------------------------------------------|
| 64 | Wathen, Harris | 2007 | A,E  | <p><b>Context:</b> North America (Canada)</p> <p><b>SP:</b> rural women</p> | Exploring women's health seeking role in rural setting with e-Health media                                                                                            | <p>(Broadband) internet and social media</p> <p>Maintaining quality healthcare while services are scaled back or cut</p> | Interviews<br><b>N= 40</b> | <p><b>Context factors in e-Health adoption:</b></p> <p>Availability (+)<br/>Lack of alternative information sources (+)<br/>Perceived information quality (+)<br/>Search skills (+)<br/>Desire to be self-reliant (+)<br/>Not want to bother others (+)<br/>Confidence in information source (+)</p> <p><b>Content factors in e-Health adoption:</b></p> <p>Fulfills need (+)<br/>Complexity of information (-)</p>                                     |
| 65 | Zhao           | 2008 | A,B1 | <p><b>Context:</b> Asia (China)</p> <p><b>SP:</b> rural farmers</p>         | Assessing ways in which internet use effects rural development (economic conditions and education) and social structures effects internet diffusion, adoption and use | <p>Community networks, computer lab</p> <p>Increasing economic and education conditions</p>                              | Interviews<br><b>N= 29</b> | <p><b>Process factors in e-Health adoption:</b></p> <p>Training (+)<br/>Technical support (+)</p> <p><b>Content factors in e-Health adoption:</b></p> <p>Costs (-)</p> <p><b>e-Health adoption outcomes:</b></p> <p>Per capita income (+)<br/>Aligning output-market (+)<br/>Business opportunities and household earning (+)<br/>Teaching qualities (+)<br/>Learning capability (+)<br/>Adult ICT readiness (+)<br/>Digital divide rural/urban (-)</p> |

|    |                  |      |      |                                                                                     |                                                             |                                                                                         |                            |                                                                                                                                                                                                                         |
|----|------------------|------|------|-------------------------------------------------------------------------------------|-------------------------------------------------------------|-----------------------------------------------------------------------------------------|----------------------------|-------------------------------------------------------------------------------------------------------------------------------------------------------------------------------------------------------------------------|
| 86 | Zilliagus et al. | 2010 | A,B1 | <p><b>Context:</b><br/>Australia</p> <p><b>SP:</b> women breast cancer patients</p> | Examining satisfaction, perceptions and quality of e-Health | <p>Videoconferencing and telehealth</p> <p>Increasing access to healthcare services</p> | Interviews<br><b>N= 12</b> | <p><b>Context factors in e-Health adoption:</b><br/>Complex cases (-)</p> <p><b>e-Health adoption outcomes:</b><br/>Telepresence increased ICT comfortability<br/>Emotional support<br/>Reduction travel/time costs</p> |
|----|------------------|------|------|-------------------------------------------------------------------------------------|-------------------------------------------------------------|-----------------------------------------------------------------------------------------|----------------------------|-------------------------------------------------------------------------------------------------------------------------------------------------------------------------------------------------------------------------|

Appendix A provides an overview of the papers included in this systematic literature review. It includes information about year of publication, research perspective, research method, main dependent variable, type of e-Health service, and main results in terms of context, process, content (sub-)factors and e-Health adoption outcomes.
